# Supplementary material for: Low-Cost Air Quality Sensor Evaluation and Calibration in Contrasting Aerosol Environments
Source: Copernicus journal article supplement (doi:10.5194/amt-2022-140), 2022-05-16
Supplement: Supplementary file 1 [file amt-2022-140-supplement.pdf]

# Low-Cost Air Quality Sensor Evaluation and Calibration in Contrasting Aerosol Environments

Pawan Gupta<sup>1,2</sup>, Prakash Doraiswamy<sup>3</sup>, Jashwanth Reddy<sup>4,1</sup>, Palak Balyan<sup>5,6</sup>, Sagnik Dey<sup>5</sup>, Ryan Chartier<sup>3</sup>, Adeel Khan<sup>7</sup>, Karmann Riter<sup>3</sup>, Brandon Feenstra<sup>8</sup>, Robert C. Levy<sup>9</sup>, Nhu Nguyen Minh Tran<sup>4</sup>, Olga Pikelnaya<sup>8</sup>, Kurinji Selvaraj<sup>8</sup>, Tanushree Ganguly<sup>7</sup>, Karthik Ganesan<sup>7</sup>

<sup>1</sup>STI-Universities Space Research Associations, Huntsville, AL, USA.

<sup>2</sup>NASA Marshall Space Flight Center, Huntsville, AL, USA

<sup>3</sup>RTI International, Research Triangle Park, NC, USA.

<sup>4</sup>The University of Alabama in Huntsville, AL, USA.

<sup>5</sup>Indian Institute of Technology, New Delhi, India

<sup>6</sup>Health Effects Institute (HEI), Boston, U.S.A.

<sup>7</sup>Council on Energy, Environment, and Water (CEEW), New Delhi, India

<sup>8</sup>South Coast Air Quality Management District, CA, USA.

<sup>9</sup>NASA Goddard Space Flight Center, Huntsville, AL, USA.

*Correspondence to:* Pawan Gupta (pawan.gupta@nasa.gov)

**Supplementary Material**

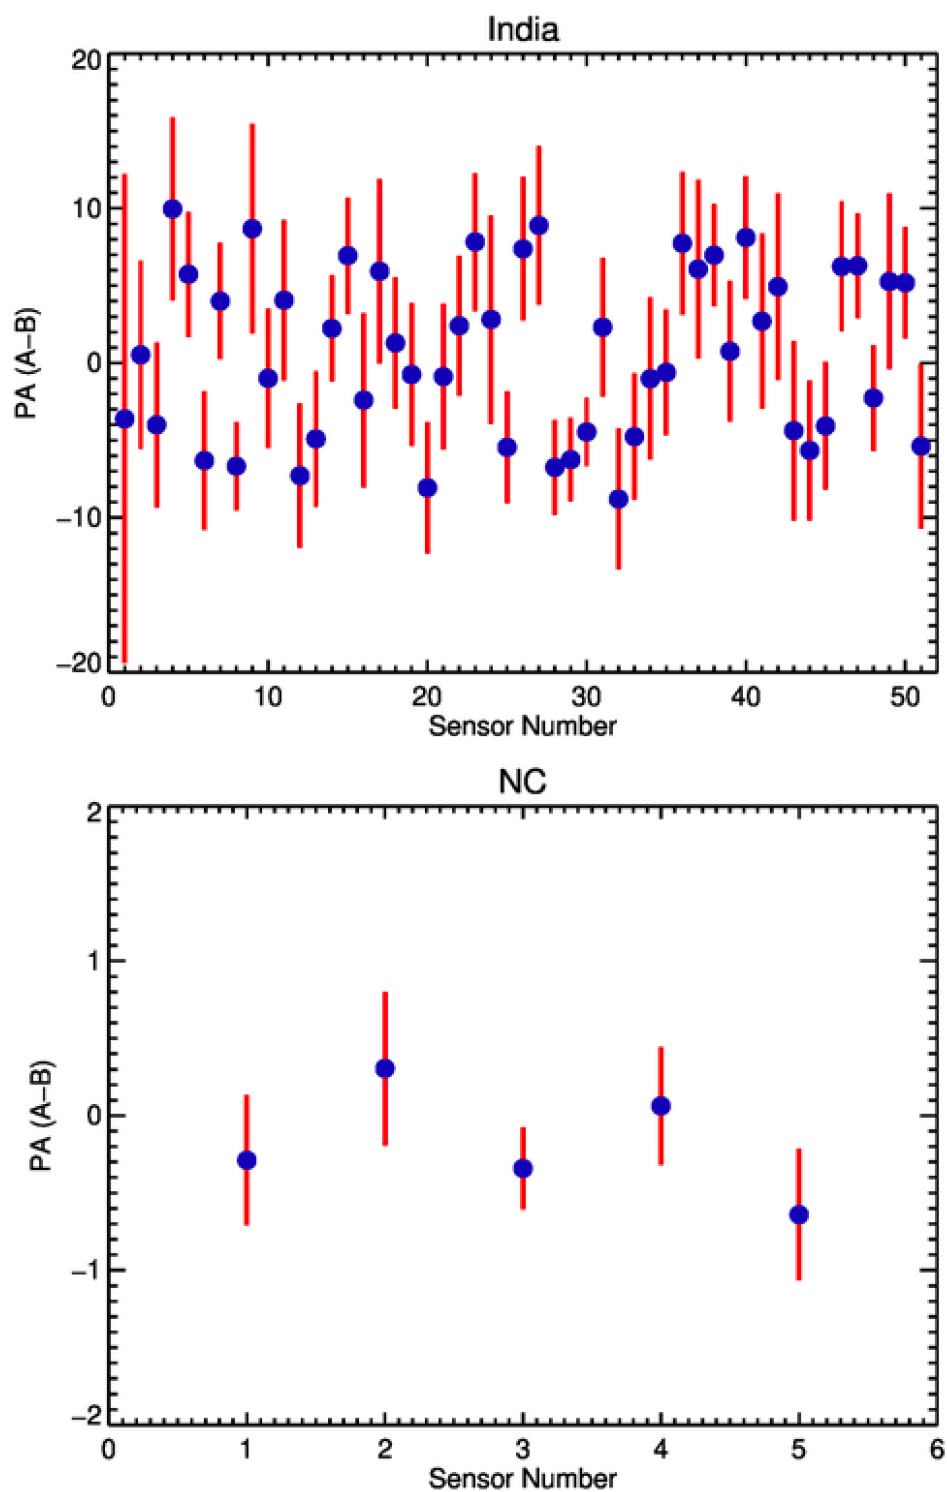

**Figure S1.** The plots showing mean difference in A & B measurements from each sensor for the two regions.

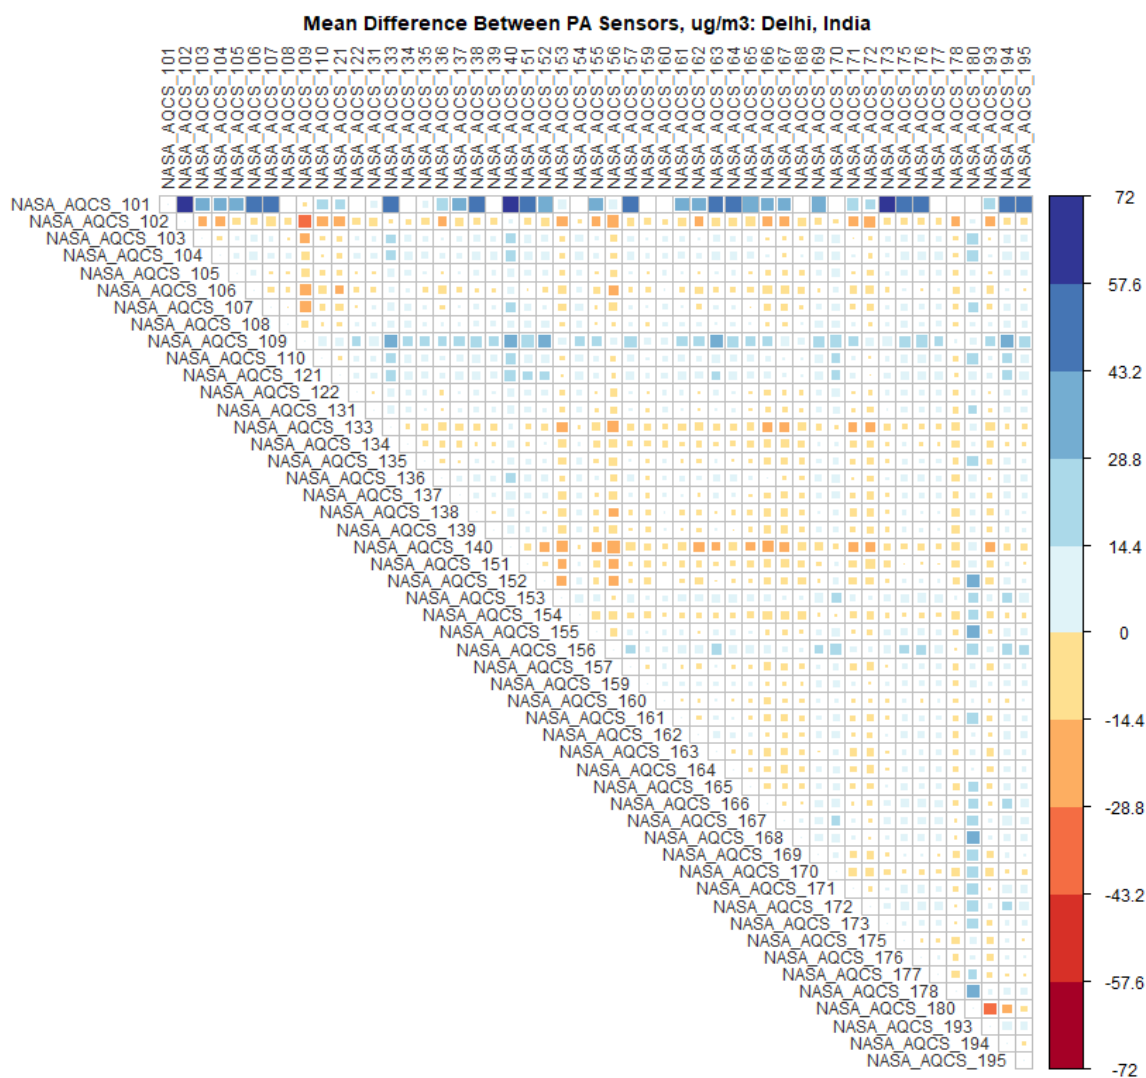

**Figure S2.1. Mean Absolute Difference ( $\mu\text{g}/\text{m}^3$ ) Between Any Two Sensors in Delhi**

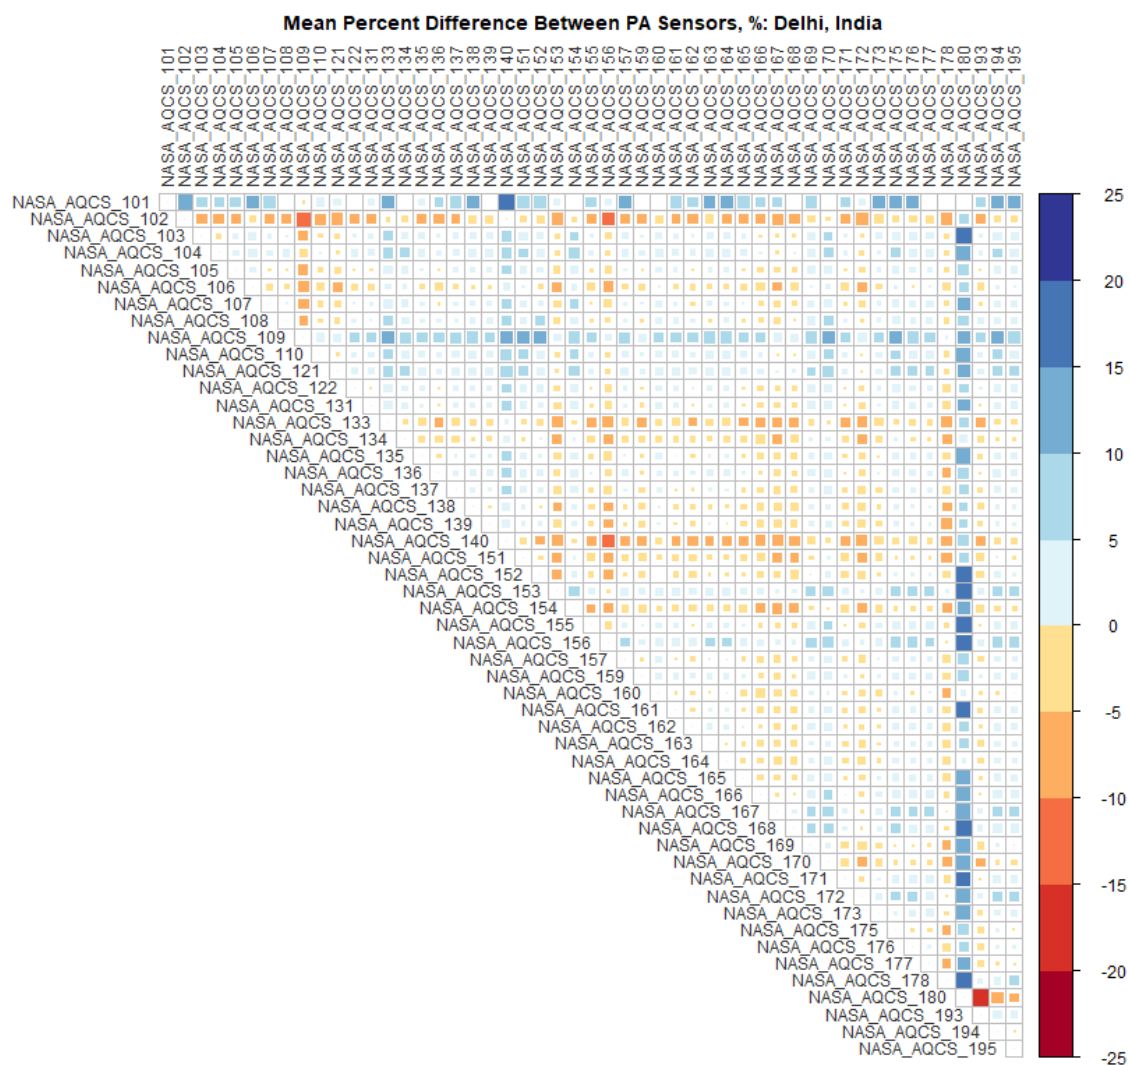

**Figure S2.2. Mean Percent (%) Difference Between Any Two Sensors in Delhi**

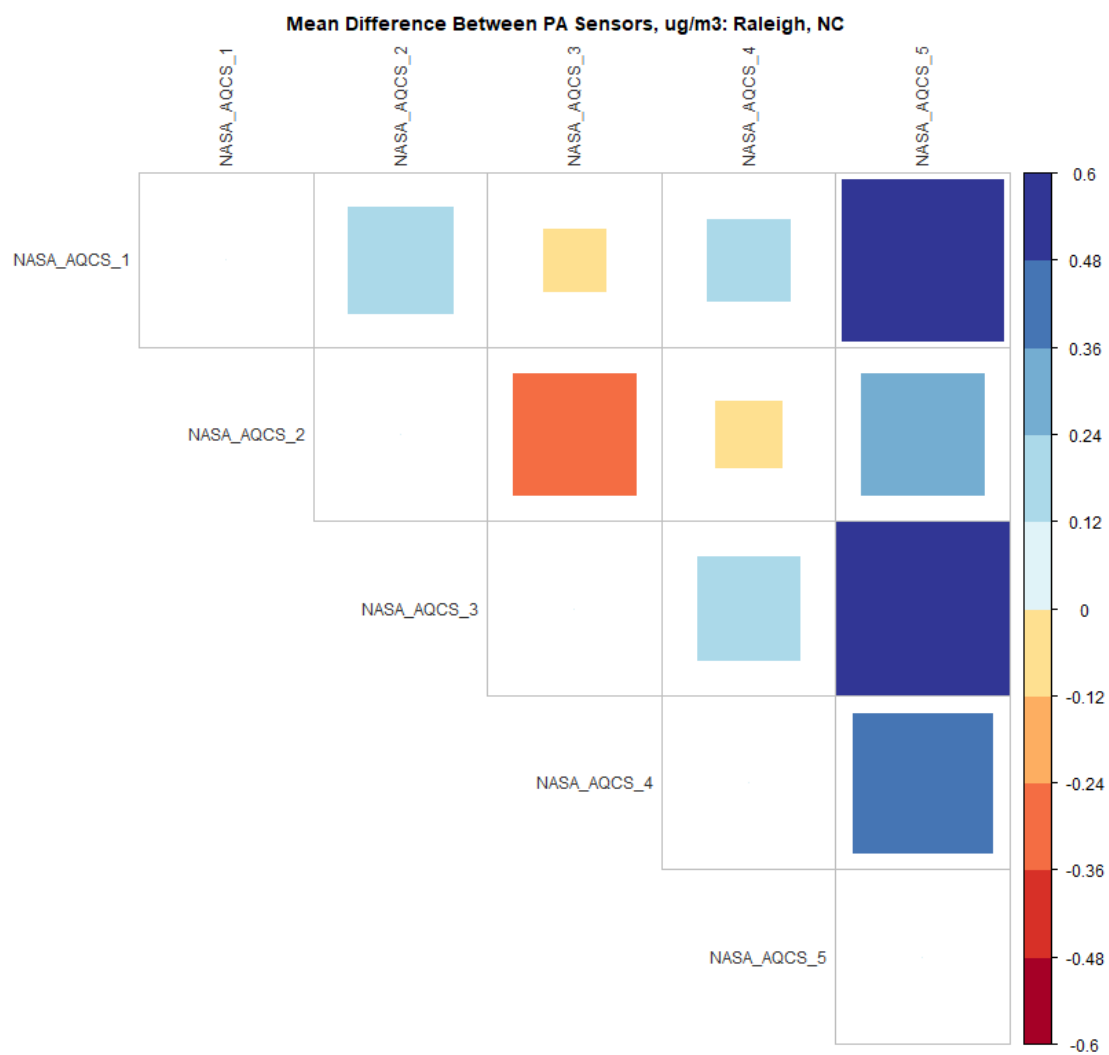

**Figure S2.3. Mean Absolute Difference ( $\mu\text{g}/\text{m}^3$ ) Between Any Two Sensors in Raleigh**

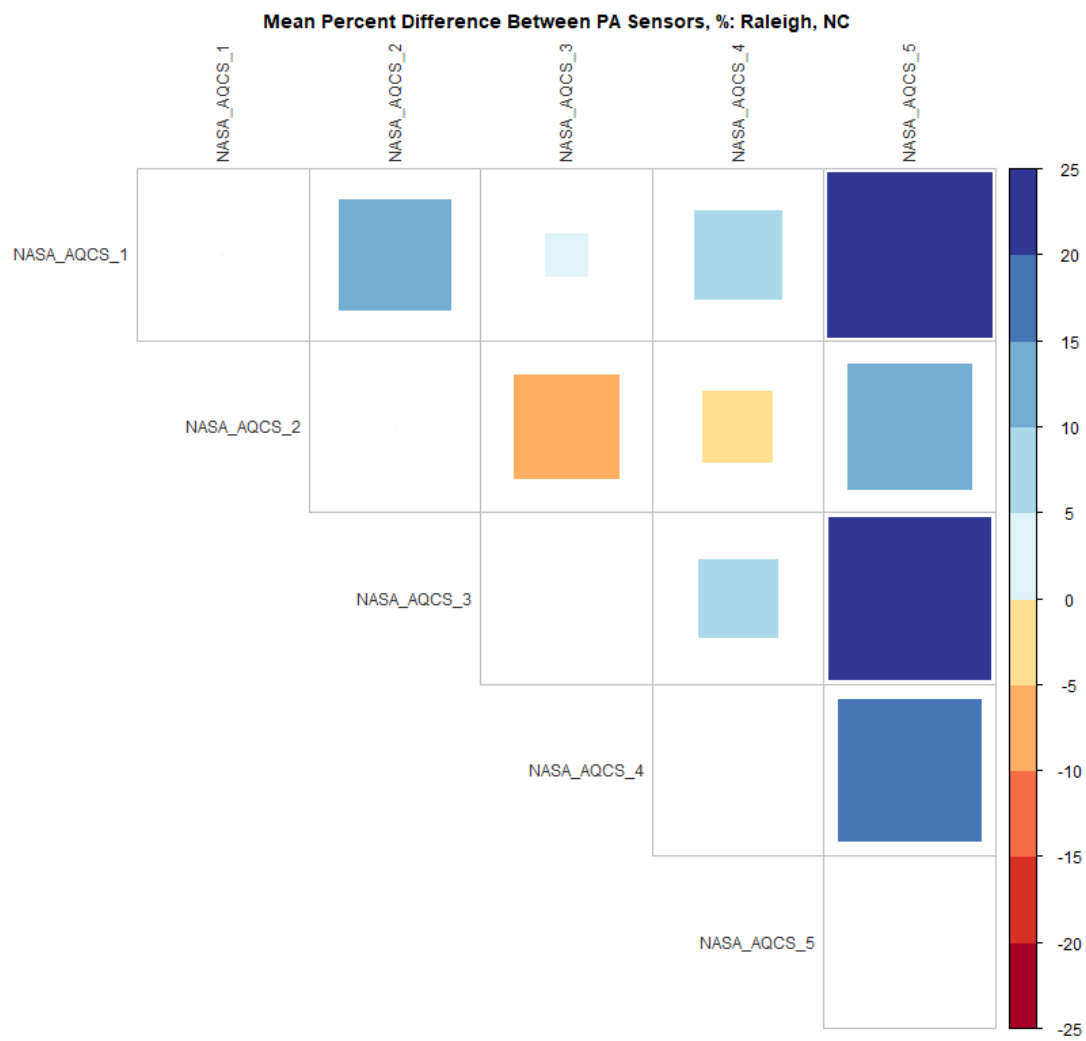

**Figure S2.4. Mean Percent (%) Difference Between Any Two Sensors in Raleigh**

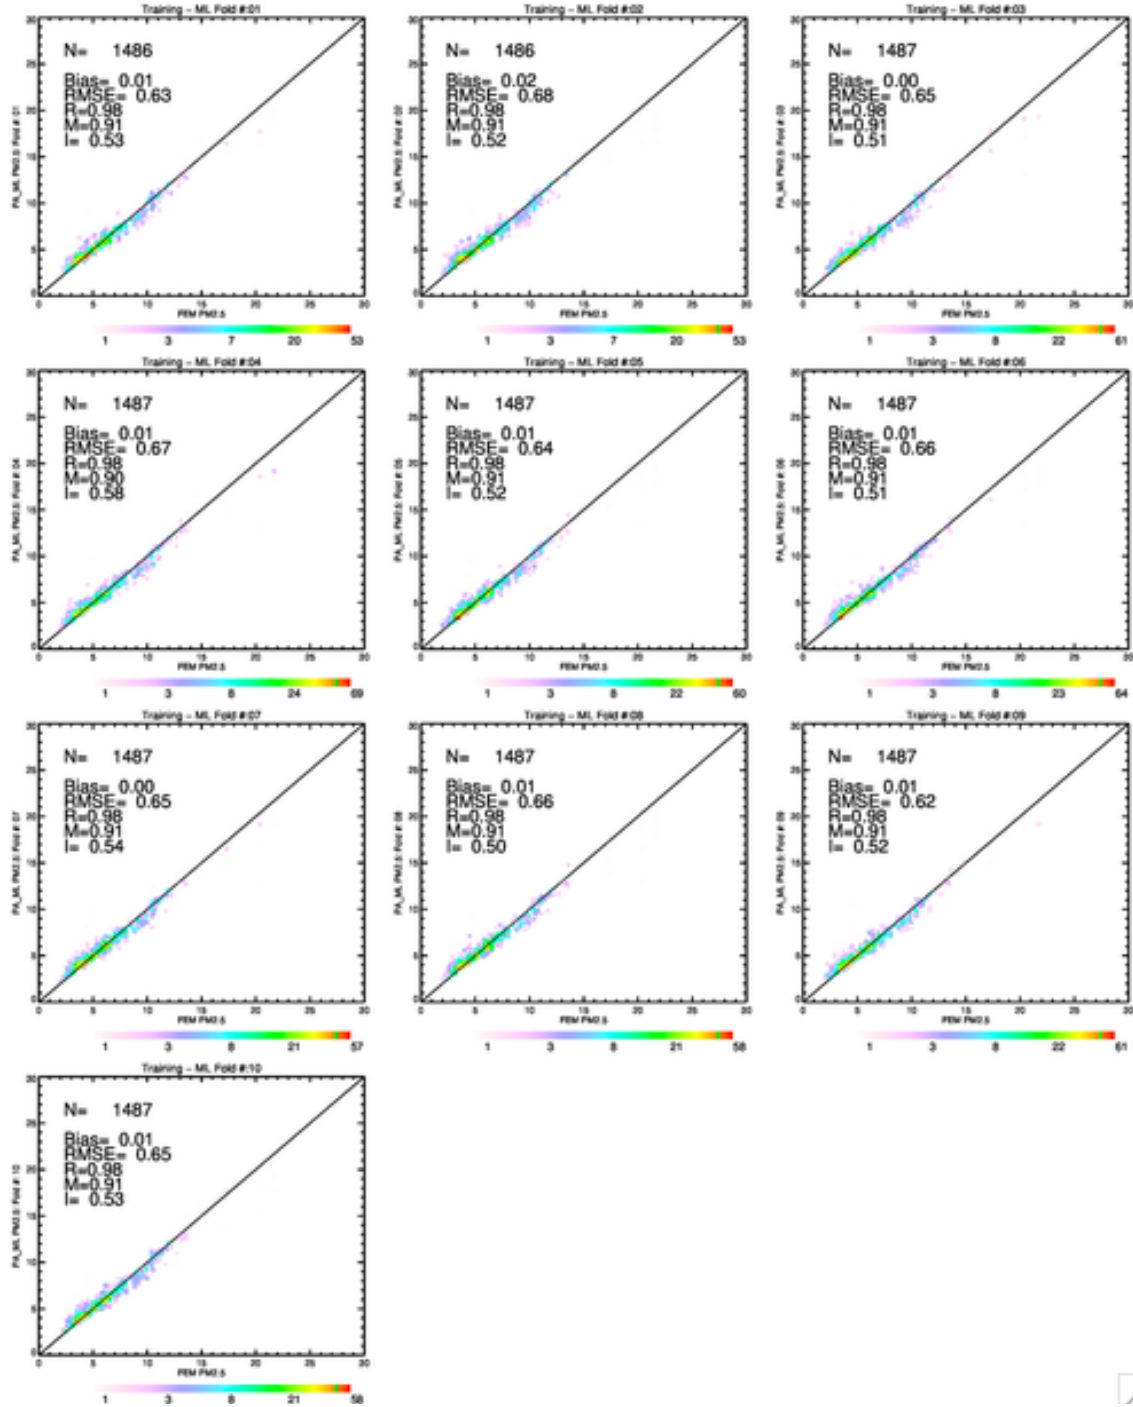

Figure S3.1 – Inter-comparison between FEM and ML output for Raleigh during 10-fold training of MLA. Each density scatter plot represents 1-fold.

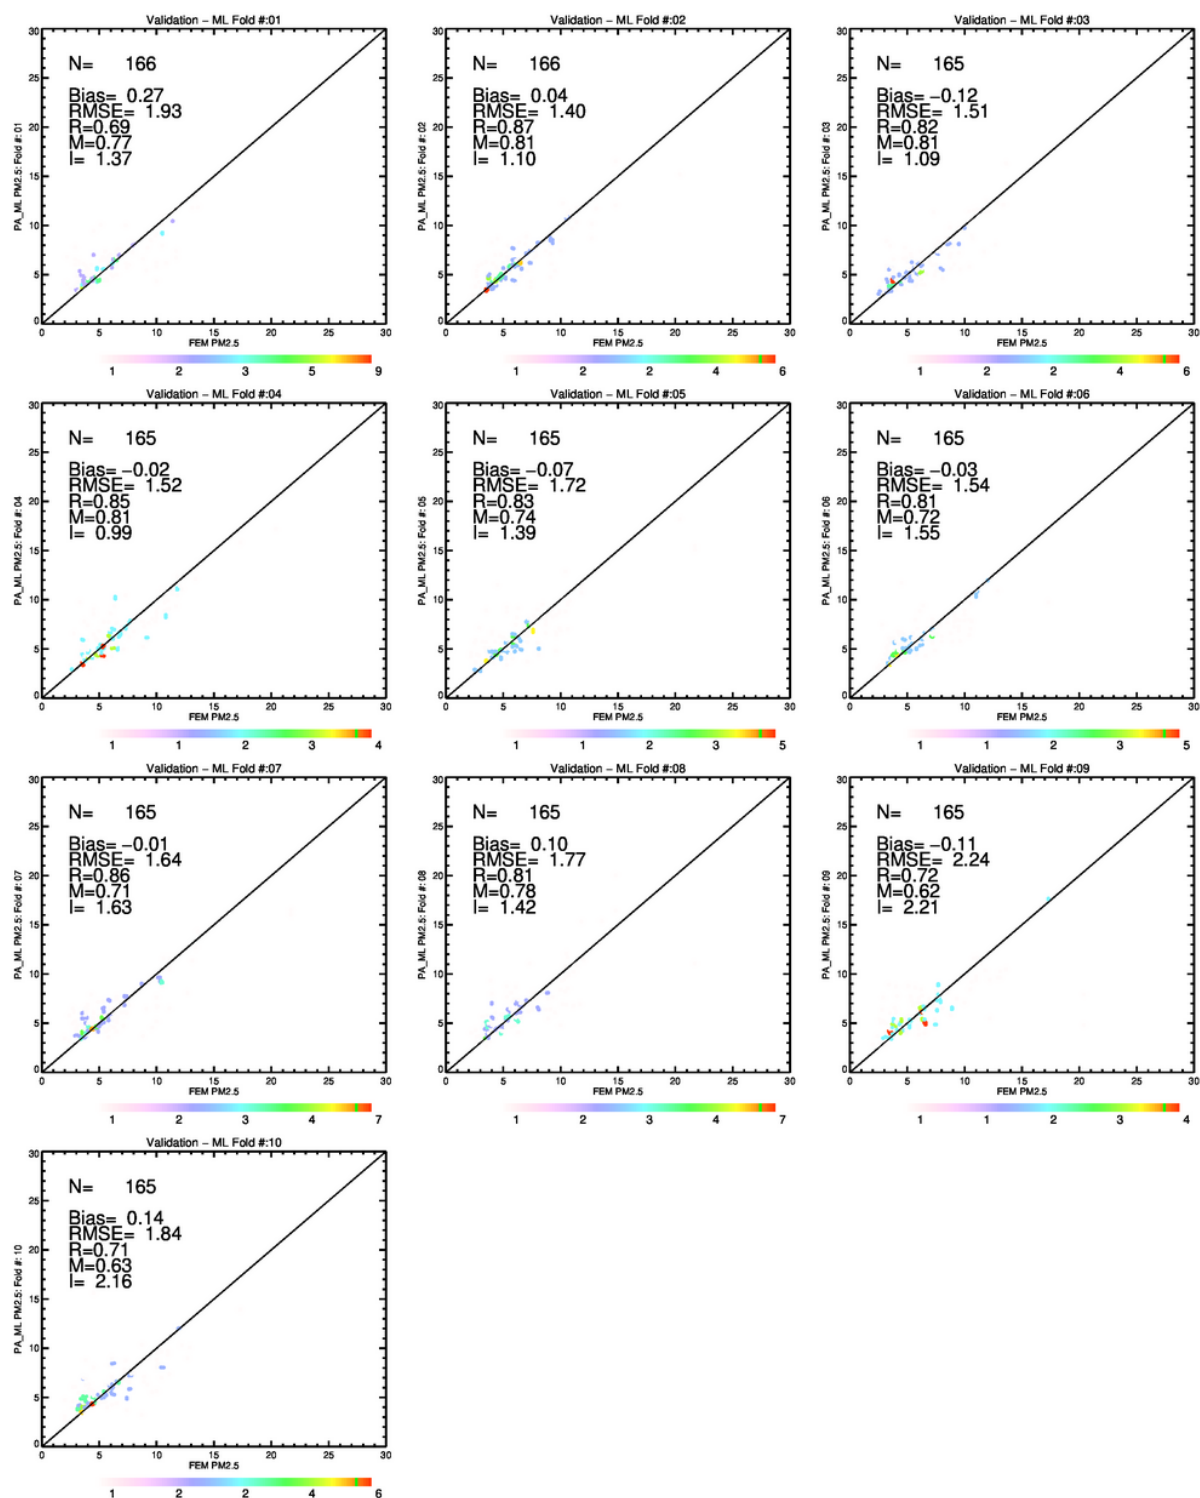

Figure S3.2 – same as Figure S3.1 but for 10-fold validation in Raleigh.



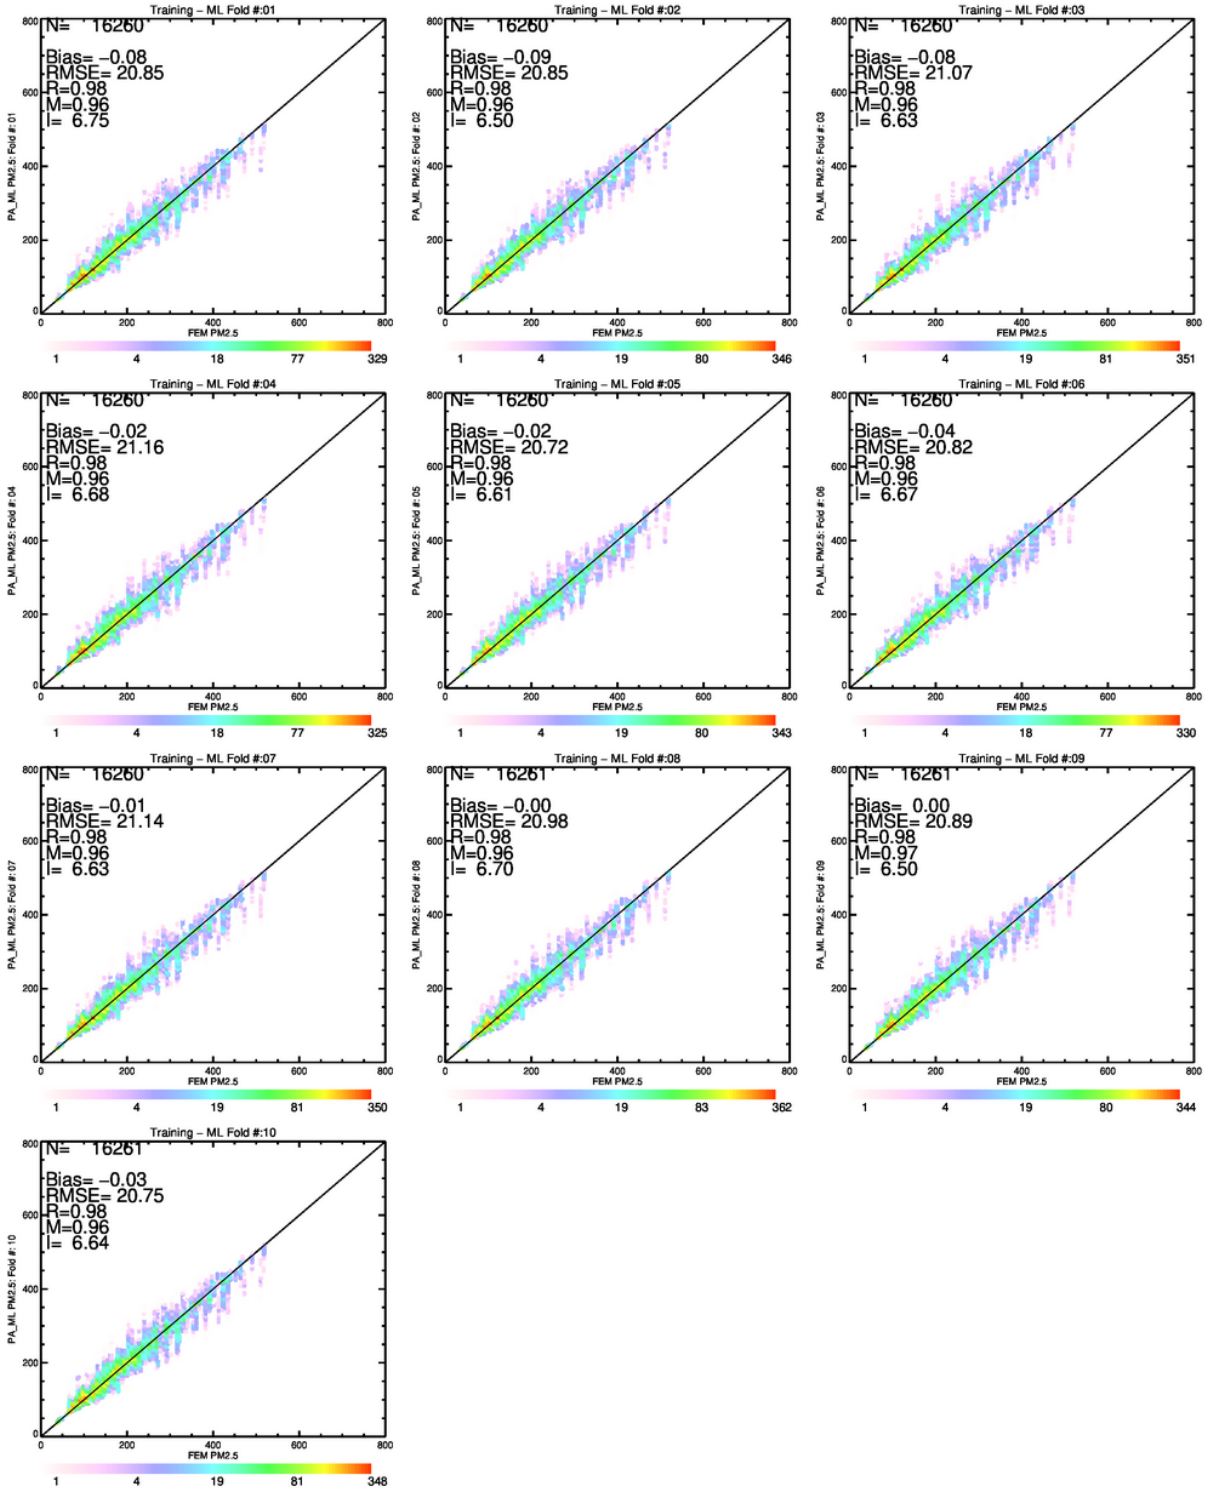

Figure S3.3 – same as Figure S3.1 but for 10-fold training for Delhi.

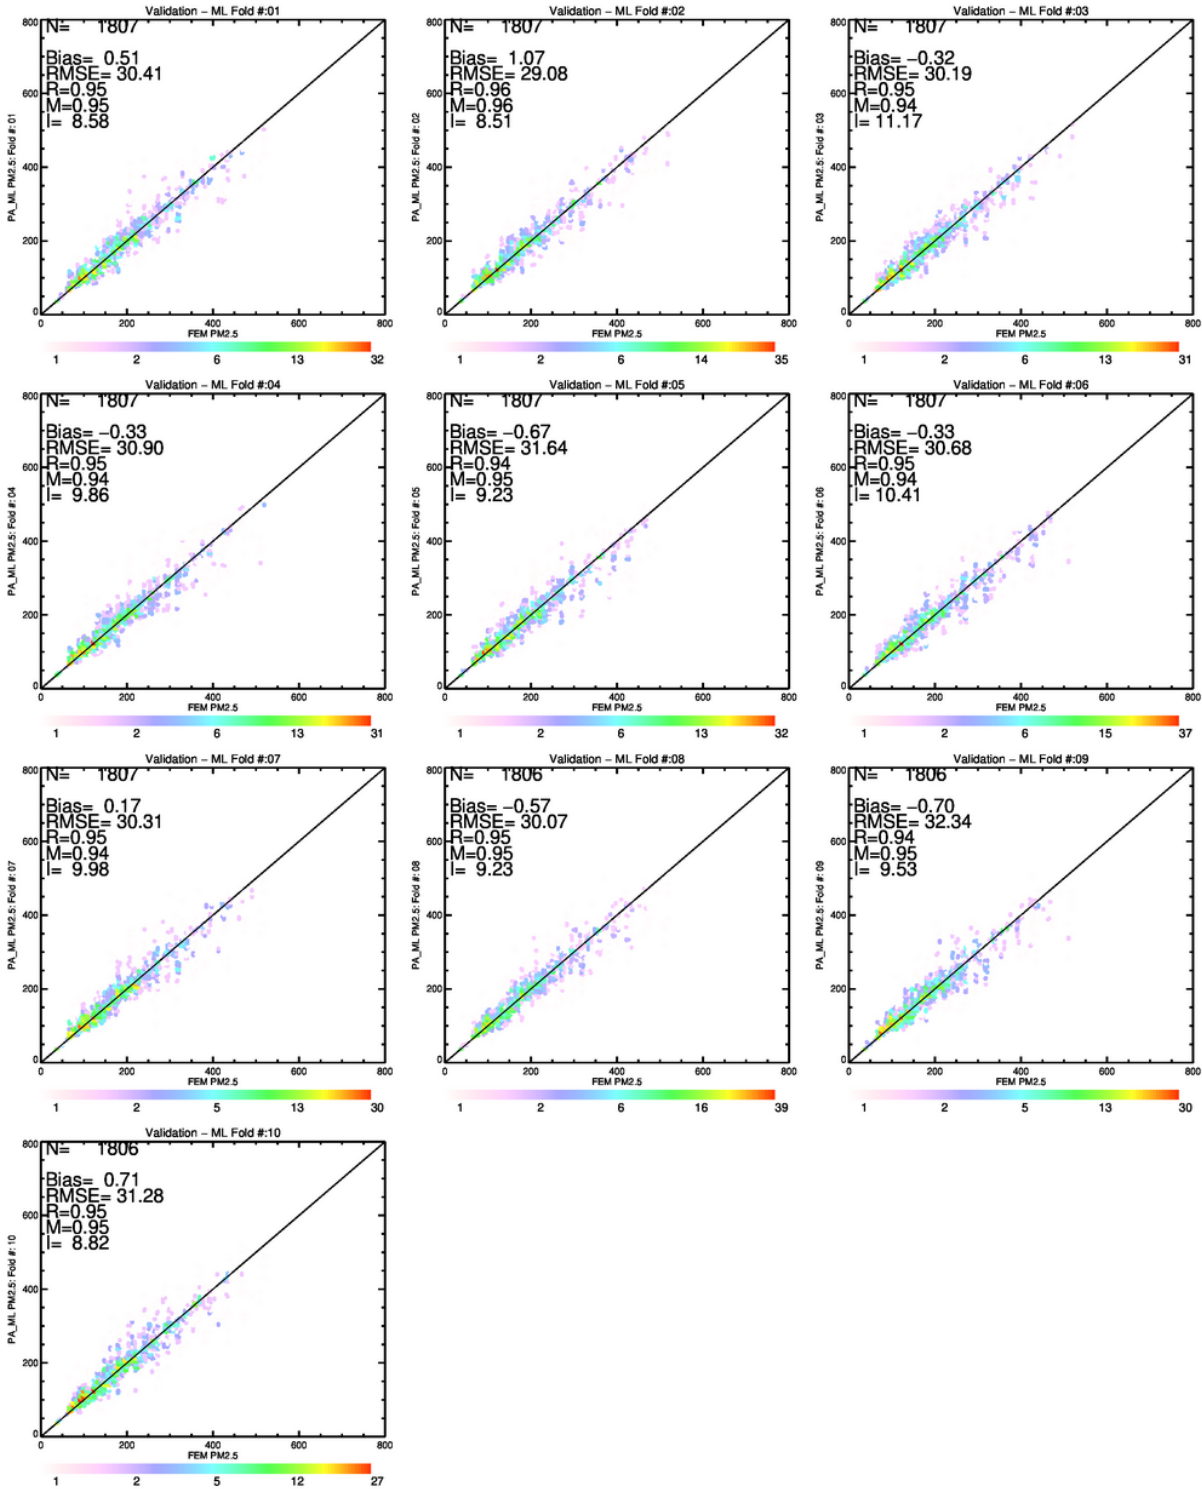

Figure S3.4 – same as Figure S3.1 but for 10-fold validation for Delhi.

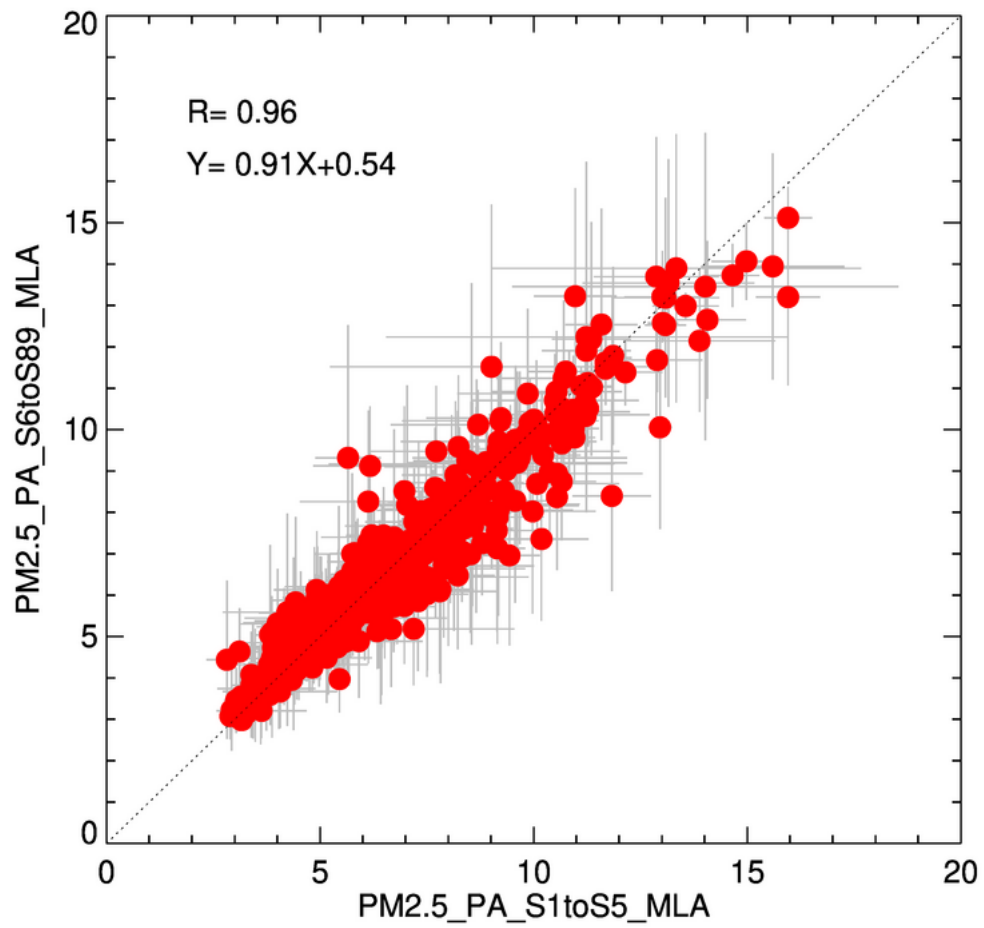

**Figure S4. ADD THIS FIGURE on Raleigh ML comparison for 84 vs. 5 sensors.**

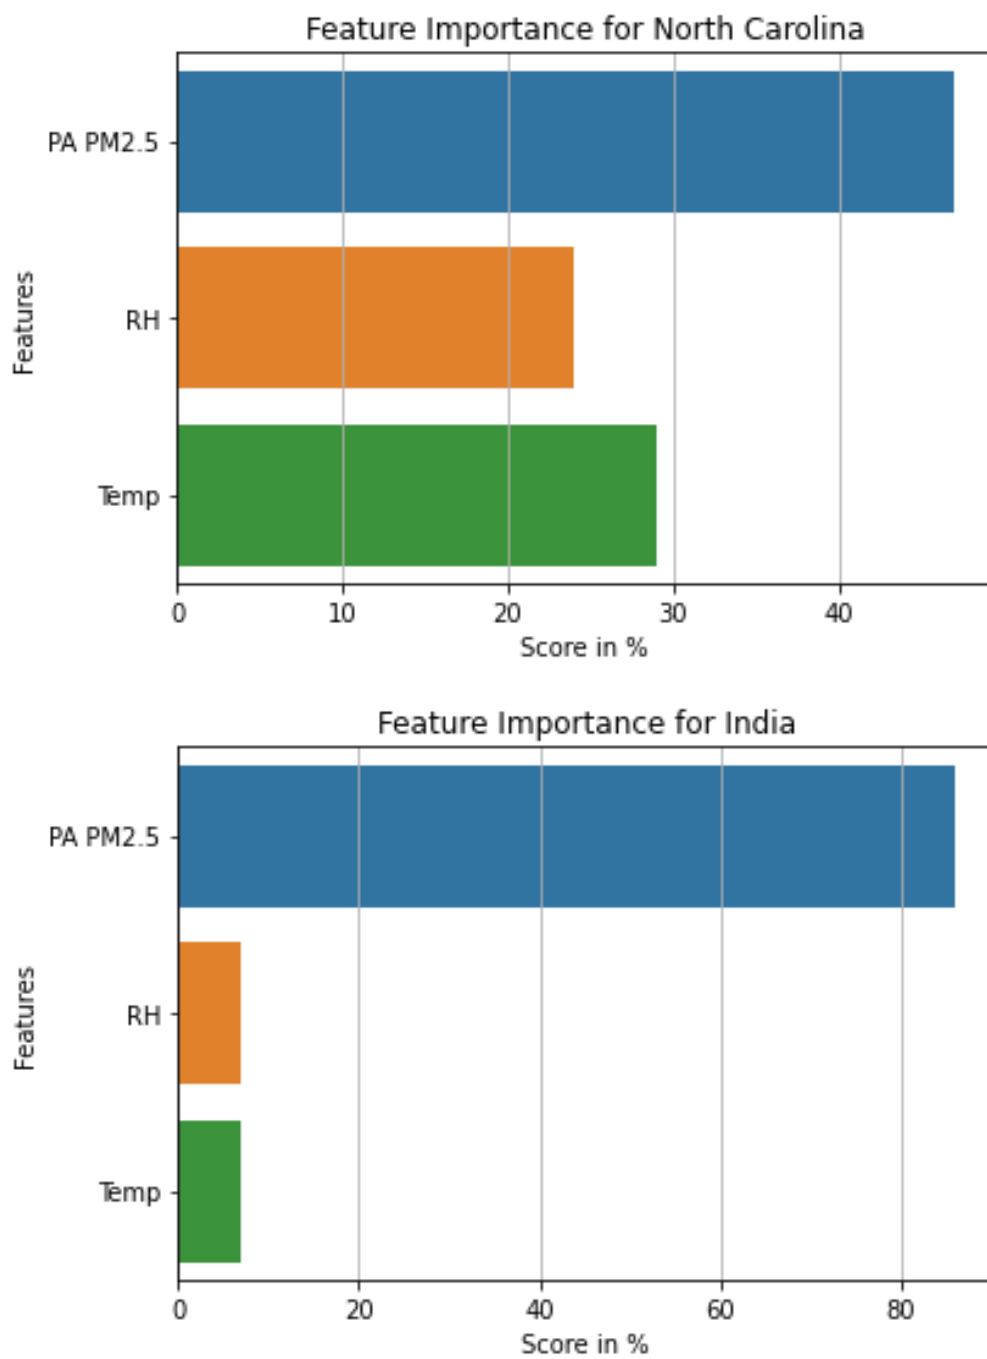

**Figure S5.** The input feature importance for RF model for Raleigh (top) and Delhi (bottom)

```

# sample code used to train RF model

# Import packages
from sklearn.model_selection import train_test_split
from sklearn.ensemble import RandomForestRegressor

# read already cleaned and quality controlled Input parameters
df = pd.read_csv('Extracted_Data_latest.csv')
X = df[['PAB_Pm25', 'Humidity', 'Temperature']]
Y = df['BAM_Pm25']

# call the function to randomly select training & testing data
# splits 75% data to train and 25% to test, test_size = 0.25
X_train, X_test, y_train, y_test = train_test_split(X, Y, random_state=0)

# call the function to train the model
regr = RandomForestRegressor(max_depth=20, random_state=2, n_estimators=50, bootstrap=True)
regr.fit(X_train, y_train)

# run trained model on training and testing data
pred_trn = regr.predict(X_train)
pred_tst = regr.predict(X_test)

# save the trained model in a file
filename = 'model_for_PAB.sav'
pickle.dump(regr, open(filename, 'wb'))

```

**Figure S6. The sample python code to train and test a random forest model.**

**Table S1. The mean bias (MB), mean percentage bias (MB%), and mean percentage absolute bias (|MB%| for hourly and daily averages. The biases before and after corrections are provided.**

| <b>Delhi</b>   | <b>Hourly</b> |                       | <b>MB</b>   | <b>MB%</b>   | <b> MB% </b> |
|----------------|---------------|-----------------------|-------------|--------------|--------------|
|                |               | <b>Raw Data</b>       | <b>35.1</b> | <b>23.8</b>  | <b>28.9</b>  |
|                |               | <b>Corrected Data</b> | <b>0.22</b> | <b>2.0</b>   | <b>9.1</b>   |
|                | <b>Daily</b>  | <b>Raw Data</b>       | <b>37.3</b> | <b>23.7</b>  | <b>25.3</b>  |
|                |               | <b>Corrected Data</b> | <b>1.3</b>  | <b>1.8</b>   | <b>5.4</b>   |
| <b>Raleigh</b> | <b>Hourly</b> | <b>Raw Data</b>       | <b>-0.8</b> | <b>-4.9</b>  | <b>604</b>   |
|                |               | <b>Corrected Data</b> | <b>0.02</b> | <b>4.1</b>   | <b>10.9</b>  |
|                | <b>Daily</b>  | <b>Raw Data</b>       | <b>-0.8</b> | <b>-11.2</b> | <b>27.7</b>  |
|                |               | <b>Corrected Data</b> | <b>0.03</b> | <b>2.2</b>   | <b>5.0</b>   |
